# Supplementary material for: Comprehensive evaluation of the effects of long-term cryopreservation on peripheral blood mononuclear cells using flow cytometry
Source: PubMed Central journal article supplement (PMC9175382; doi:10.1186/s12865-022-00505-4), 2022-06-07
Supplement: 12865_2022_505_MOESM2_ESM.pdf [file 12865_2022_505_MOESM2_ESM.pdf]

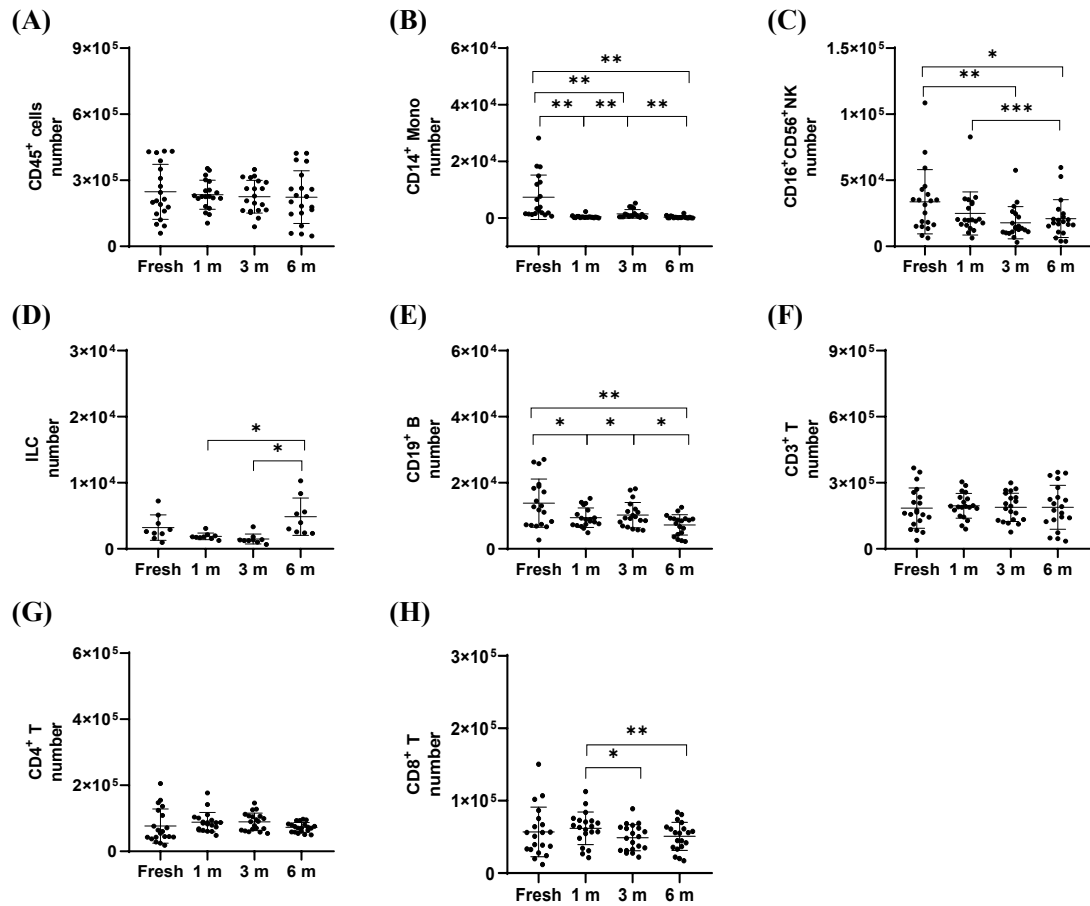

Supplemental Figure.1 The absolute cell count of long-term cryopreserved PBMCs subtypes. (A)leucocytes (B)CD14<sup>+</sup> Monocytes (C)CD16<sup>+</sup>CD56<sup>+</sup> NK (D)ILC in Lineage<sup>-</sup> lymphocytes (E)CD19<sup>+</sup> B (F) CD3<sup>+</sup> T (G)CD4<sup>+</sup> Th (H) CD8<sup>+</sup> Tc in fresh isolated and cryopreserved(1,3 and 6 mo,respectively) PBMCs.\*P<0.05, \*\*P<0.01,\*\*\*P<0.001
