# Supplementary material for: Comprehensive evaluation of the effects of long-term cryopreservation on peripheral blood mononuclear cells using flow cytometry
Source: PubMed Central journal article supplement (PMC9175382; doi:10.1186/s12865-022-00505-4), 2022-06-07

(A)

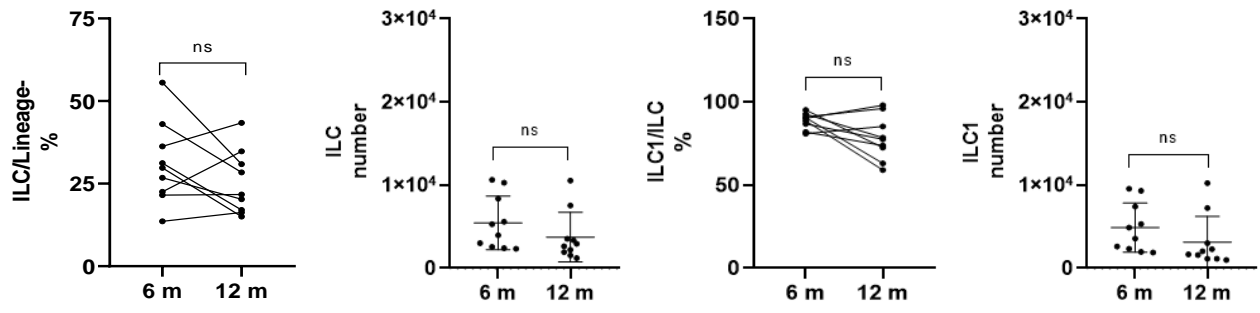

Supplement: 12865_2022_505_MOESM3_ESM.pdf [file 12865_2022_505_MOESM3_ESM.pdf]
